# Supplementary material for: TECHNICAL NOTE: Coupling infrared gas analysis and cavity ring down spectroscopy for autonomous, high temporal resolution measurements of DIC and δ 13 C-DIC
Source: Copernicus journal article supplement (doi:10.5194/bg-2016-503), 2016-11-22
Supplement: Supplementary file 1 [file bg-2016-503-supplement.zip]

## **Supplementary Information**

The supporting information contains 23 pages, one AutoIt computer script, one MATLAB script, one Table, two Figures, and available as an attachment is 1 .csv file.

## 1 Experimental Section

### 1.1 AutoIt computer script

#cs Start of comment

This script is based on timed mouse clicks and keyboard entries.

- 5 In order that the script works, the user needs to have a monitor with the same screen resolution as the one used for our case (1366 x 768 pixels).

If not, the parameters passed to the functions regarding positioning of mouse clicks will need to be changed in order that the script works properly.

This script deals entirely with the software controlling the AIRICA by means of automating its operation.

- 10 It consists of a large infinite loop (While 1 ... WEND) that has two main parts: the first part is optimizes sampling and analysis for concentration measurements, while the second part optimizes them for isotopic measurement.

Learn more about AutoIt for Laboratory Automation from Practical Laboratory Automation Made easy with AutoIt by Matheus Carvalho ISBN: 978-3-527-34158-0.

- 15 #ce End of comment

opt("Wintitlematchmode",1)

- 20 While 1

WinMove("AIRICA measurement","",0,0)

WinActivate("AIRICA measurement")

\*\*\*\*\*

- 25 ;Start of first part of the script

\*\*\*\*\*

;clicking on edit sample list

MouseDown("left",50,180)

Sleep(1000)

5 ;adding sample name

MouseDown("left",440,508)

Sleep(1000)

Send("{BACKSPACE 50}{DEL 50}")

Send("Sample")

10 Send("@YDAY&@HOUR&@MIN)

Sleep(500)

MouseDown("left",520,508)

Sleep(500)

MouseDown("left",645,508)

15 Sleep(1000)

;clicking on edit calculation mode

MouseDown("left",200,255)

Sleep(1000)

20 MouseClick("left",300,265)

Send("{BACKSPACE 5}{DEL 5}")

Send("2")

Sleep(1000)

MouseDown("left",320,305)

25 Sleep(1000)

```

Send("{UP 10}")

Send("{ENTER}")

MouseClicked("left",475,305)

Sleep(1000)

5   Send("{ENTER}")

    Sleep(1000)

;clicking on edit extraction parameters

MouseClicked("left",175,325)

10  Sleep(1000)

    MouseClick("left",645,175)

    Send("{BACKSPACE 5}{DEL 5}")

    Send("210")

    Sleep(500)

15  MouseClick("left",645,200)

    Send("{BACKSPACE 5}{DEL 5}")

    Send("50")

    Sleep(500)

    MouseClick("left",645,225)

20  Send("{BACKSPACE 5}{DEL 5}")

    Send("60")

    Sleep(500)

    MouseClick("left",645,250)

    Send("{BACKSPACE 5}{DEL 5}")

25  Send("0")

```

```

Sleep(500)

MouseClicked("left",645,370)

Send("{BACKSPACE 5}{DEL 5}")

Send("80")

5   Sleep(500)

MouseClicked("left",645,418)

Send("{BACKSPACE 5}{DEL 5}")

Send("2")

Sleep(500)

10  MouseClick("left",645,440)

Send("{DOWN 5}{UP}")

Send("{ENTER}")

MouseClicked("left",635,535)

Sleep(1000)

15  Send("{ENTER}")

Sleep(1000)

Send("{ENTER}")

Sleep(1000)

20  ;click on set flow parameter

MouseClicked("left",910,85)

Sleep(1000)

MouseClicked("left",630,325)

Send("{BACKSPACE 5}{DEL 5}")

25  Send("300")

```

MouseDown("left",630,388)

Sleep(1000)

Send("{ENTER}")

Sleep(1000)

5

;click on set blank

MouseDown("left",560,85)

Sleep(1000)

MouseDown("left",500,420)

10 Send("{BACKSPACE 10}{DEL 10}")

Send("2")

MouseDown("left",595,430)

Sleep(1000)

15 ;clicking on sample to start measurement

MouseDown("left",224,134)

Sleep(1000)

MouseDown("left",95,95)

Sleep(1000)

20 Send("{ENTER}")

Sleep(1000)

Send("{ENTER}")

Sleep(1000)

25 ;monitoring a pixel in order to deal with different analysis times, if necessary

```

Sleep(10*1000)

$TargetPixelColor = PixelGetColor(268,63)

While $TargetPixelColor <> 6684444

    Sleep(5000)

5      $TargetPixelColor = PixelGetColor(268,63)

WEnd

Sleep(20*1000)

,*****

10 ;Start of second part of the script

,*****

;clicking on edit sample list

WinMove("AIRICA measurement","",0,0)

15 WinActivate("AIRICA measurement")

MouseClicked("left",50,180)

Sleep(1000)

;adding sample name

20 MouseClick("left",440,508)

Sleep(1000)

Send("{BACKSPACE 50}{DEL 50}")

Send("Sample")

Send(@YDAY&@HOUR&@MIN)

25 Sleep(500)

```

MouseClicked("left",520,508)

Sleep(500)

MouseClicked("left",645,508)

Sleep(1000)

5

;clicking on edit calculation mode

MouseClicked("left",200,255)

Sleep(1000)

MouseClicked("left",300,265)

10    Send("{BACKSPACE 5}{DEL 5}")

Send("1")

Sleep(1000)

MouseClicked("left",320,305)

Sleep(1000)

15    Send("{UP 10}")

Send("{ENTER}")

MouseClicked("left",475,305)

Sleep(1000)

Send("{ENTER}")

20    Sleep(1000)

;clicking on edit extraction parameters

MouseClicked("left",175,325)

Sleep(1000)

25    MouseClick("left",645,175)



```

Send("{BACKSPACE 5}{DEL 5}")

Send("380")

Sleep(500)

MouseClicked("left",645,200)

5   Send("{BACKSPACE 5}{DEL 5}")

    Send("25")

    Sleep(500)

    MouseClick("left",645,225)

    Send("{BACKSPACE 5}{DEL 5}")

10  Send("45")

    Sleep(500)

    MouseClick("left",645,250)

    Send("{BACKSPACE 5}{DEL 5}")

    Send("0")

15  Sleep(500)

    MouseClick("left",645,370)

    Send("{BACKSPACE 5}{DEL 5}")

    Send("15")

    Sleep(500)

20  MouseClick("left",645,418)

    Send("{BACKSPACE 5}{DEL 5}")

    Send("1")

    Sleep(500)

    MouseClick("left",645,440)

25  Send("{UP 6}")

```

Send("{ENTER}")

MouseClicked("left",635,535)

Sleep(1000)

Send("{ENTER}")

5 Sleep(1000)

Send("{ENTER}")

Sleep(1000)

;click on set flow parameter

10 MouseClick("left",910,85)

Sleep(1000)

MouseClicked("left",630,325)

Send("{BACKSPACE 5}{DEL 5}")

Send("70")

15 Sleep(1000)

MouseClicked("left",630,388)

Sleep(1000)

Send("{ENTER}")

Sleep(1000)

20

;click on set blank

MouseClicked("left",560,85)

Sleep(1000)

MouseClicked("left",500,420)

25 Send("{BACKSPACE 10}{DEL 10}")

```
Send("200")
```

```
Sleep(1000)
```

```
MouseClick("left",595,430)
```

```
Sleep(1000)
```

5

```
;clicking on sample to start measurement
```

```
MouseClick("left",224,134)
```

```
Sleep(1000)
```

```
MouseClick("left",95,95)
```

10    Sleep(1000)

```
Send("{ENTER}")
```

```
Sleep(1000)
```

```
Send("{ENTER}")
```

```
Sleep(1000)
```

15

```
Sleep(10*1000)
```

```
$TargetPixelColor = PixelGetColor(268,63)
```

```
While $TargetPixelColor <> 6684444
```

```
    Sleep(5000)
```

20        \$TargetPixelColor = PixelGetColor(268,63)

```
WEnd
```

```
MouseClick("left",938,124)
```

```
Sleep(1000)
```

25    MouseClick("left",670,405)

```
Send("{BACKSPACE 10}{DEL 10}")
```

```
Send("300")
```

```
Sleep(8000)
```

```
MouseClick("left",765,400)
```

```
5 Sleep(1000)
```

```
Sleep(50*1000)
```

```
WEnd
```

## 1.2 Matlab script

%Matlab Script for processing CRDS data from PICARRO (csv export) 01/08/2016

%Inquiries please direct to K.G. Schulz (kai.schulz@scu.edu.au)

5 %1) Remove headers from PICARRO output csv (see PICARRO\_out.csv for details)

%2) Replace comma by space in PICARRO output csv

%3) Remove occasional 'Z' in last line of PICARRO output csv

%4) PICARRO output csv has to start below peak cut-off def., i.e. pCO<sub>2</sub> below 400

%5) Remove any prolonged portions above the cut-off def., which

10 %are not associate to peaks from seawater injections

%(e.g. measurements of laboratory air). Otherwise those parts will be

%identified as peaks and inflate the matrix.

%6) Delta13C\_DIC values for the large CRDS injections and

%corresponding times are stored in a matrix called 'FinalOutput'

15

clear all

close all

fread='PICARRO\_out.csv'; %name of PICARRO input csv in same folder as

20 %this script

%means of carrier gas (instrument air) C12 and C13 concentrations

%and isotopic signature determined from several hours of continuous measurements

25



%Compiling peak area data in a single matrix each

peaks12=ones(max(diff(dpfsa)),round(length(dpfsa)))\*NaN;

5 peaks13=ones(max(diff(dpfsa)),round(length(dpfsa)))\*NaN;

deltaC=ones(max(diff(dpfsa)),round(length(dpfsa)))\*NaN;

peakstime=ones(max(diff(dpfsa)),round(length(dpfsa)))\*NaN;

10 peaklength(1:(pfsa(dpfsa(1))-pfsa(1)+1),1)=(pfsa(dpfsa(1))-pfsa(1)+1);

peaks12(1:(pfsa(dpfsa(1))-pfsa(1)+1))=X12CO2([pfsa(1):pfsa(dpfsa(1))]);

peaks13(1:(pfsa(dpfsa(1))-pfsa(1)+1),1)=X13CO2([pfsa(1):pfsa(dpfsa(1))]);

deltaC(1:(pfsa(dpfsa(1))-pfsa(1)+1),1)=Delta\_Raw\_iCO2([pfsa(1):pfsa(dpfsa(1))]);

peakstime(1:(pfsa(dpfsa(1))-pfsa(1)+1))=time([pfsa(1):pfsa(dpfsa(1))]);

15

for i=2:length(dpfsa)

peaks12(1:(pfsa(dpfsa(i))-pfsa(dpfsa(i-1)+1)+1),i)= ...

X12CO2([pfsa(dpfsa(i-1)+1):pfsa(dpfsa(i))]);

peaks13(1:(pfsa(dpfsa(i))-pfsa(dpfsa(i-1)+1)+1),i)= ...

20 X13CO2([pfsa(dpfsa(i-1)+1):pfsa(dpfsa(i))]);

deltaC(1:(pfsa(dpfsa(i))-pfsa(dpfsa(i-1)+1)+1),i)= ...

Delta\_Raw\_iCO2([pfsa(dpfsa(i-1)+1):pfsa(dpfsa(i))]);

peakstime(1:(pfsa(dpfsa(i))-pfsa(dpfsa(i-1)+1)+1),i)= ...

time([pfsa(dpfsa(i-1)+1):pfsa(dpfsa(i))]);

25 peaklength(i)=(pfsa(dpfsa(i))-pfsa(dpfsa(i-1)+1)+1);

```

end

deltaC_added=((peaks12+peaks13).*deltaC-(carriergas12+ ...
               carriergas13)* ...
5         carriergasdelta)./(peaks12+peaks13-carriergas12- ...
               carriergas13);

mean_peakstime=nanmean(peakstime);

10 %filter for outliers, i.e. off by more than 2 std in comparison to
    %mean

deltaC_mean=nanmean(deltaC_added);
deltaC_std=nanstd(deltaC_added);
15
deltaC_added_it1=deltaC_added;

for i=1:length(dpfsa)
    deltaC_added_it1(find( abs(deltaC_mean(i)-deltaC_added(:,i)) > abs(deltaC_std(i).*2)),i)=NaN;
20 end

deltaC_mean_it1=nanmean(deltaC_added_it1);
deltaC_std_it1=nanstd(deltaC_added_it1);

25 %%%%%%%%%second iteration

```



```
deltaC_added_it2=deltaC_added_it1;
```

```
for i=1:length(dpfsa)
```

```
5         deltaC_added_it2(find( abs(deltaC_mean_it1(i)-deltaC_added_it1(:,i)) >  
abs(deltaC_std_it1(i).*2)),i)=NaN;
```

```
end
```

```
deltaC_mean_it2=nanmean(deltaC_added_it2);
```

```
10 deltaC_std_it2=nanstd(deltaC_added_it2);
```

```
%%%%%%%%%%third itteration
```

```
deltaC_added_it3=deltaC_added_it2;
```

```
15
```

```
for i=1:length(dpfsa)
```

```
        deltaC_added_it3(find( abs( deltaC_mean_it2(i)-deltaC_added_it2(:,i)) >  
abs(deltaC_std_it2(i).*2)),i)=NaN;
```

```
end
```

```
20
```

```
deltaC_mean_it3=nanmean(deltaC_added_it3);
```

```
deltaC_std_it3=nanstd(deltaC_added_it3);
```

```
%%%%%%%%%%final itteration
```

```
25
```

```
deltaC_added_final=deltaC_added;
```

```

deltaC_mean_final=deltaC_mean;

deltaC_std_final=deltaC_std;

for g=1:40

for i=1:length(dpfsa)

5      deltaC_added_final(find( abs(deltaC_mean_final(i)-deltaC_added_final(:,i)) >
abs(deltaC_std_final(i).*2)),i)=NaN;

end

deltaC_mean_final=nanmean(deltaC_added_final);

10    deltaC_std_final=nanstd(deltaC_added_final);

end

%distinguish between small peaks for DIC measurements and large for

%d13C_DIC

15

large=find(peaklength>170&peaklength<450);

small=find(peaklength<150&peaklength>25);

%create matrix with data for large peaks only

20    C12_pm_large=peaks12(:,large);

delta_pm_large=deltaC(:,large);

time_pm_large=peakstime(:,large);

%final output

25    %measurement time and isotopic composition

FinalOutput=[mean_peakstime(large)' deltaC_mean_final(large)']

```

```
%some data visualization
```

```
figure
```

```
5 axes('Position',[0.15 0.5 0.8 0.4])
```

```
plot(time, X12CO2,'k')
```

```
ylabel('^{12}CO_2 (ppmv)')
```

```
10 xlabel('Time since start of the Experiment')
```

```
text(7.695,-400, 'Please note the two small peaks (seawater injections for determination of DIC)')
```

```
text(7.695,-490, 'followed by a large peak (injection for determination of carbon isotope signature)')
```

```
15 axis([7.695 7.84 0 1000])
```

```
figure
```

```
axes('Position',[0.15 0.5 0.8 0.4])
```

```
20
```

```
plot(time_pm_large,C12_pm_large)
```

```
ylabel('^{12}CO_2 (ppmv)')
```

```
xlabel('Time since start of the Experiment')
```

```
25
```

```
text(7.695,-400, 'Large peaks as identified by the script, resulting from the slow seawater')
```

```
text(7.695,-490, '\rm injection, and used for subsequent $\rm \delta^{13}C_{DIC}$  
calculations','Interpreter','latex')
```

5

```
axis([7.695 7.84 0 1000])
```

```
figure
```

```
axes('Position',[0.15 0.5 0.8 0.4])
```

10 `plot(mean_peakstime(large), deltaC_mean_final(large),'ko','MarkerFaceColor','k')`

```
ylabel('\rm \delta^{13}C_{DIC} (^{\fontsize{7}o}/{\fontsize{7}oo})','Interpreter','tex')
```

```
xlabel('Time since start of the Experiment')
```

15 `text(7.695,-3.4, 'Calculated $\rm \delta^{13}C_{DIC}$, using the large paeks','Interpreter','latex')`

```
axis([7.695 7.84 -3 -2])
```

```
end
```

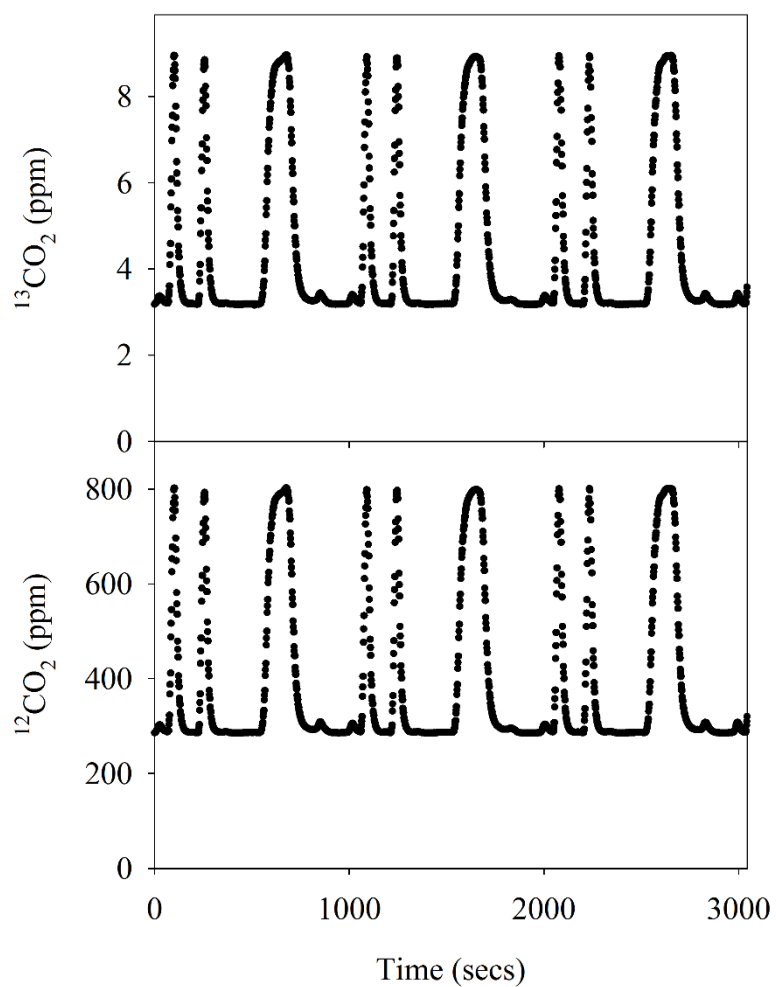

**Figure S1.** Typical output from the CRDS showing 3 measurements cycles for  $^{13}\text{CO}_2$  (top) and  $^{12}\text{CO}_2$  (bottom).

An individual measurement cycle consists of the AIRICA system acidifying 3 aliquots of water. The first is a  
 5 rinse, the second used to determine DIC concentration, and the third to determine  $\delta^{13}\text{C}$ -DIC.

## 2 Results and Discussion

**2.1 Table S1.**  $\delta^{13}\text{C}$  values – IRMS (‰)

|                                                   | $\delta^{13}\text{C}$ – IRMS (‰) | $\delta^{13}\text{C}$ DIC – AIRICA-CRDS (‰) |
|---------------------------------------------------|----------------------------------|---------------------------------------------|
| Carbonate Standard 1 ( $\text{Na}_2\text{CO}_3$ ) | $-3.2 \pm 0.1$ (n = 3)           |                                             |
| Standard 1 (~500 $\mu\text{mol}$ )                |                                  | $-3.47 \pm 0.63$ (n = 7)                    |
| Standard 1 (~1000 $\mu\text{mol}$ )               |                                  | $-3.77 \pm 0.17$ (n = 6)                    |
| Standard 1 (~1900 $\mu\text{mol}$ )               |                                  | $-3.68 \pm 0.16$ (n = 57)                   |
| Standard 1 (~2800 $\mu\text{mol}$ )               |                                  | $-3.60 \pm 0.11$ (n = 6)                    |
| Standard 1 (~3600 $\mu\text{mol}$ )               |                                  | $-3.58 \pm 0.07$ (n = 8)                    |
| Carbonate Standard 2 ( $\text{K}_2\text{CO}_3$ )  | $-26.8 \pm 0.1$ (n = 3)          |                                             |
| Standard 2 (~2000 $\mu\text{mol}$ )               |                                  | $-26.67 \pm 0.17$ (n = 7)                   |

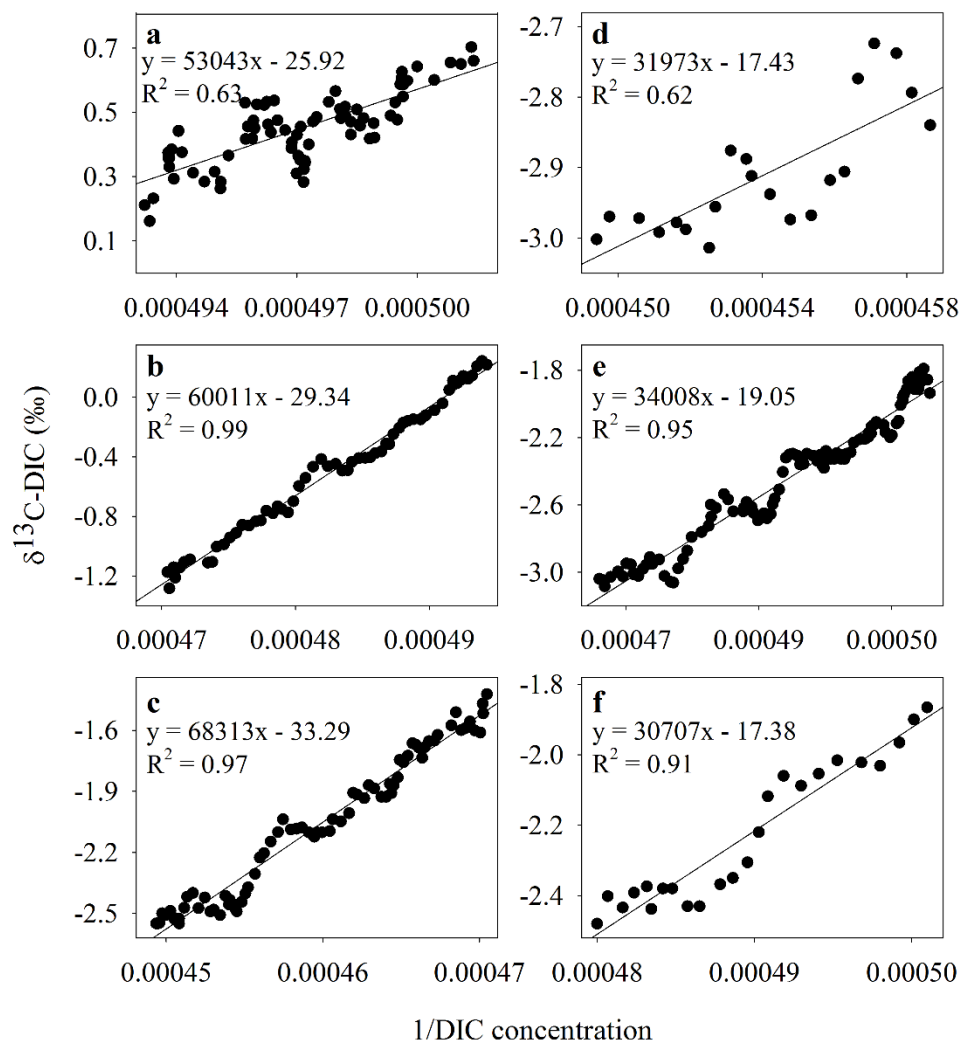

**Figure S2.** Regressions of  $1/\text{DIC concentration}$  vs.  $\delta^{13}\text{C-DIC}$  values (Keeling plots). Letters correspond with the linear increase/decrease in DIC concentrations shown in Figure 4.
